1                   **A freshwater zooplankton in the face to boat noise**  
2                                           **pollution**

3   **Loïc Prosnier<sup>\*1,2</sup>, Emilie Rojas<sup>1</sup> and Vincent Médoc<sup>1</sup>**

4                   1. Equipe Neuro-Ethologie Sensorielle, ENES/CRNL, CNRS UMR 5292, Université de  
5                   Lyon/Saint-Etienne, 23 rue du Dr Paul Michelon, 42023 Saint-Etienne Cedex 2, France

6                   2. Pôle emploi, 42000 Saint-Etienne, France.

7

8                   \* Corresponding author. Loïc Prosnier, ENES, Université Jean Monnet - St-Etienne, Campus  
9                   Métare, Bâtiment K. 21, rue du Dr Paul Michelon 42100 Saint-Etienne, FRANCE.

10                   [lprosnier@gmail.com](mailto:lprosnier@gmail.com) ORCID: 0000-0001-5576-3601

11

12

## 13 **Abstract**

14 Ecotoxicological studies mainly focus on chemical pollution, however, since past decades,  
15 there has been a growing interest for the acoustic pollution. Previous studies on underwater  
16 acoustic pollution showed that noise affects vertebrates' behaviour, like fish and marine  
17 mammals. However, little is known about other organisms. Consequently, we studied important  
18 lacking aspects, well known with chemical pollution: the effect on a key zooplankton species  
19 (used as bioindicator) and the effect on fitness (survival and fecundity). We exposed isolated  
20 water fleas, *Daphnia magna*, to chronic boat noise or to a silence broadcasted as control, from  
21 birth to death. We measured effects on lifespan and clonal offspring production (e.g., clutch  
22 size, number of produced offspring along life). We did not observe any effect of the chronic  
23 boat noise exposition on *Daphnia*'s fitness. These results are consistent with results on previous  
24 acute noise exposure, but also opposite to other ones found with acute and chronic noise effect.  
25 Thus, we discuss how the noise structure and temporal pattern could affect its impacts on  
26 aquatic organisms. Our work highlights that noise pollution should be integrated in  
27 ecotoxicological studies, but also that some particular aspects of this pollutant should be  
28 considered differently than chemical pollutants.

29

30 **Keyword:** *Daphnia magna*, Acoustic pollution, Boat noise, Fitness, Survival, Reproduction.

31

## 32        **1. Introduction**

33        Freshwater ecosystems suffer seriously from all type of anthropogenic pollutions (e.g.,  
34        chemicals, light, radioactivity, nanopollution, sound) (see for instance Longcore & Rich, 2004;  
35        André et al., 2011; Song et al., 2020; Jan et al., 2022) but the most documented to date remain  
36        chemical pollutions (e.g., industrial effluents, urban waste, pesticides, drugs) (Truhaut, 1977;  
37        Villeneuve & Garcia-Reyero, 2011). Toxicological studies have documented, in a  
38        comprehensive and accurate way, the effects of different type of pollutants (ion, heavy metals,  
39        drugs), exposure durations (acute or chronic), intensity (e.g., EC50, LD50-respectively Half  
40        maximum Effective Concentration and Lethal Dose) and their interactions between them and  
41        with environmental parameters (temperature, acidity, humidity ...). Those results contributed  
42        to the knowledge allowing the assessment of other types of pollution. In our study, we were  
43        interested in acoustic, or noise, pollution, that is now described as pervasive and omnipresent  
44        in all ecosystems (terrestrials, marine, and freshwater) (Shannon et al., 2016; Popper &  
45        Hawkins, 2019; Kunc & Schmidt, 2019), and lead to an increasing amount of research  
46        (Williams et al., 2015). Specifically, we focused on the ship noise, which is the major noise  
47        threat to freshwater systems (Duarte et al., 2021).

48        One particular threat of noise pollution is the different temporal patterns that it presents:  
49        chronic or acute exposure (Duarte et al., 2021). Chronic exposure means a continuous, also  
50        intermittent, regular, or random, sound (e.g., turbine, boat noise) whereas acute exposure  
51        represents punctual sound (e.g., airgun) (Nichols et al., 2015; McCauley et al., 2017). The  
52        nature of acoustic pollution, affecting frequency and temporal pattern, is known to affect  
53        behaviour and physiology of organisms in different way. For instance, in aquatic studies, fish  
54        are more affected by a random noise, than by a continuous or regular one (Nichols et al., 2015).  
55        These results are interpreted as an ability for vertebrates to habituate to some long-term noise

56 exposition (Rojas et al., 2021). However, there is a lack concerning questions about the effect  
57 of noise on survival and fecundity because it focuses substantially on behaviour (Richardson et  
58 al., 1985; Duarte et al., 2021). Thus, contrary to many ecotoxicological studies, since Truhaut  
59 (1977), there remains a gap in understanding how stress due to noise pollution affects individual  
60 fitness.

61 Noise pollution studies largely neglected lower trophic levels (small organisms,  
62 invertebrates, without hearing system) (Hawkins et al., 2015), yet generally used as  
63 bioindicators in ecotoxicology (Parmar et al., 2016). Although they did not possess hearing  
64 structures, they present mechanoreceptors that allow them to detect environmental vibration.  
65 For instance, Gassie et al. (1993) showed that marine copepods detect water vibrations, and  
66 Buskey et al. (2002) that vibrations lead to an individual acceleration. Consequently, acute or  
67 chronic noise expositions should be able to affect invertebrates. In fact, marine zooplankton  
68 (e.g., copepods) exposed to acute airguns induce negative effect of their survival (McCauley et  
69 al., 2017). Additionally, an important zooplankton predator (*Chaoborus flavicans*) increased  
70 anti-predatory defence behaviour when exposed to short-term exposure to boat noise (Rojas et  
71 al., 2021). These works highlight that noise could affect both fitness and behaviour of  
72 zooplankton species, however they studied only an acute noise exposition.

73 Therefore, we investigated the effect of chronic exposure to motorboat noise (intermittent  
74 and irregular noises) on the fitness of the water flea *Daphnia magna*. Recent works showed  
75 contradictory results concerning their response to noise. It was found no change in their  
76 mobility when exposed to acute noise (Sabet et al., 2015, 2019), whereas prior experiment on  
77 broadband noise chronic exposure (i.e., a continuous noise) showed that noise was able to alter  
78 both fitness and behaviour (Prosnier et al., 2022). Consequently, we expected that motorboat  
79 noise stresses *D. magna*, and thus negatively affects their fitness, by reducing survival or

80 fecundity or both, according to McCauley et al. (2017). However, note that Prosnier et al. (2022)  
81 surprisingly showed a higher survival of individuals exposed to noise.

## 82 **2. Material and Methods**

### 83 84 *2.1. Collection and maintenance of organisms*

85 *Daphnia magna* had been purchased from Aqualiment (Grand Est, France) and stored in  
86 20 L aquarium, filled with aged tap water, for one month. They were reared at 18°C under a  
87 12:12 light:dark cycle. *D. magna* were fed, each two days, with 0.05g of algae, a mix with 80%  
88 of *Arthrospira platensis* and 20% of *Aphanizomenon flos-aquae* (Algo'nergy® Spiruline +  
89 Klamath).

### 90 *2.2. Fecundity and mortality*

91 We measured reproductive success and survival during an experiment (similar as done in  
92 Prosnier et al., 2022). We collected gravid *D. magna* from aquarium and isolated them in 50 mL  
93 jars containing Volvic® water. Newborns (<24h) were transferred individually into 150 mL  
94 glass-microcosms, closed with an X-mesh tissue allowing water flows and noise transmission.

95 We used four 150L rectangular tanks (75 x 60 x 35 cm), filled with 90L of aged tap water,  
96 at 20-22°C and under a 12:12 light:dark cycle where 18 glass-microcosms were disposed at 20  
97 cm of a underwater loudspeaker. We broadcasted silence in two control tanks and a boat noise  
98 playlist (see below) as treatment in the two other tanks. For each *D. magna* mother, we exposed  
99 half of the newborns to the control treatment, and the other half to the noise treatment, thus in  
100 the two conditions individuals are clones. Each day, survival and newborns production were  
101 controlled – if *D. magna* spawned, we counted and took off offspring. Each two days, we fed  
102 individuals with 2 mL of algae (1g/L), and each week water changes were performed. During  
103 the first days of the experiment (i.e., before the first hatchings), we replaced dead *D. magna* by

104 new individuals to increase the number of replicates. Experiments were performed with 115  
105 juveniles (58 exposed to control and 57 to noise treatment) coming from 25 mothers.

### 106 2.3. Acoustic treatments

107 We exposed *D. magna* to two acoustic treatments (see Rojas et al., 2021, for more details):  
108 either silence, a repeated 1-h playlist without sound, or boat noise, a playlist with 2 x 75 boat  
109 noises, from 15 recorded boat noises in Grangent lake broadcasted from 9 a.m. to 6 p.m. (Fig.  
110 1a). We modified the intensity of the 15 boat noises, from 0 to -25 dB Re 1  $\mu$ Pa by 5 dB, to  
111 obtain 75 noises from 103 to 150 dB, using the software Adobe Audition 2020 (13.0.0.519,

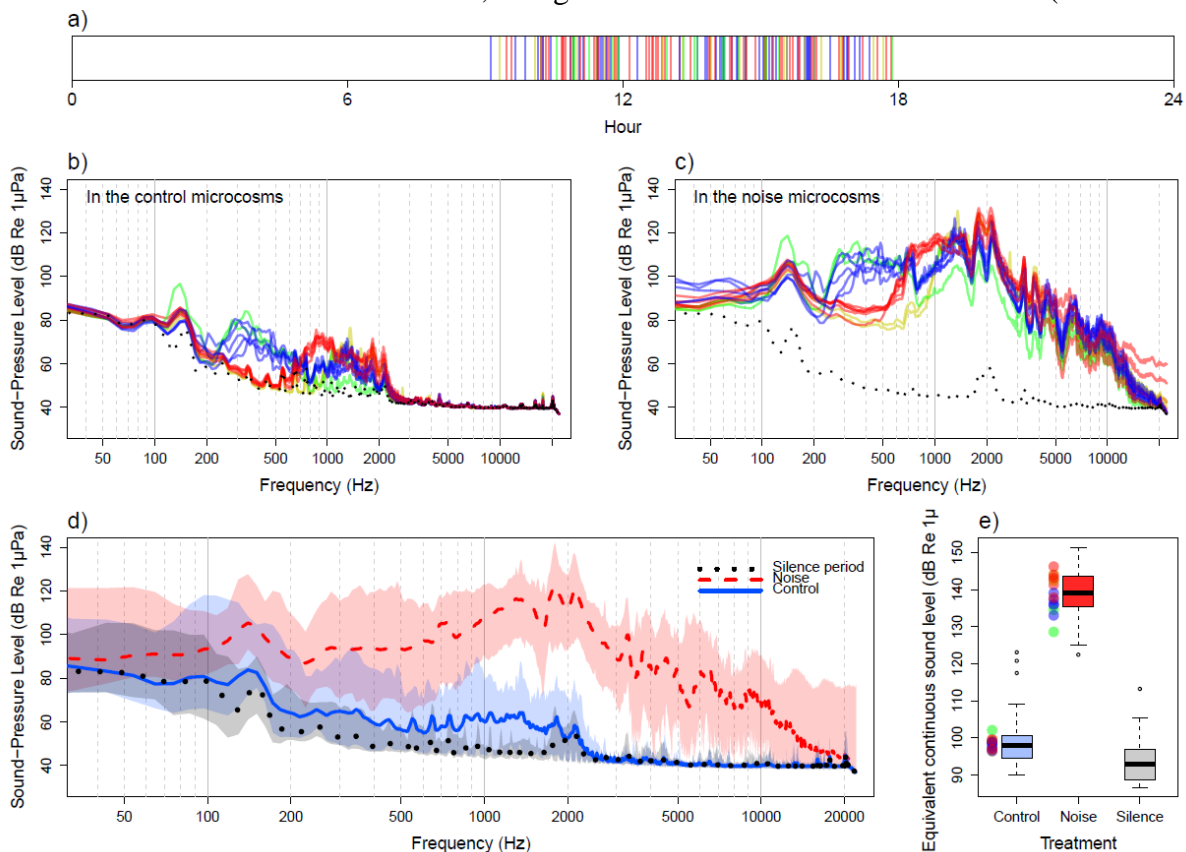

**Figure 1.** Acoustic treatments. a) 24h temporal sequence of the broadcasted motor boat noises, from 9 a.m. to 6 p.m. Each vertical line represents a boat. b) Sound measured in half of the microcosms in control tank, during the 15 boat broadcasts at their maximal intensity (solid lines) and silence broadcast (dotted line). c) Sound measured in half of the microcosms in noise tank, during the 15 boat broadcasts at their maximal intensity (solid lines) and silence broadcast (dotted line). d) Sound measures in half of the microcosms. Thick lines are means for control (full blue line) and noise treatment (dashed red line) during the 15 boat broadcasts at their maximal intensity, and during the silence period (dotted black line). Shaded areas delimit the min and max SPL. e) Sound levels in half microcosms. Central bars represent the median, boxes the interquartile range, and dots the outliers ( $> 1.5$  times the interquartile range). Coloured dots are the sound level in control and noise microcosms during the 15 boat broadcasts at their maximal intensity. The four colours (red, yellow, green, blue) correspond to the four visual category used for the noise correction.

112 Adobe Systems Inc., Mountain View, CA, USA). Sounds (stereo WAV files) have been played  
113 back using a Zoom® H4n recorder connected to an amplifier (DynaVox® CS-PA 1MK), and  
114 an underwater loudspeaker UW30 (Electro Voice®). To check the sound spectrum and intensity  
115 in both control and noise microcosms we re-recorded noise (Fig. 1b-e) with a Zoom® H4n  
116 coupled to a hydrophone (Aquarian Audio H2A-HLR Hydrophone, frequency response from  
117 10 to 100 kHz), previously calibrated with a hydrophone (8104, Brüel & Kjær, Naerum,  
118 Denmark; sensitivity  $-205$  dB re.  $1$  V  $\mu\text{Pa}^{-1}$ ; frequency response from  $0.1$  Hz to  $180$  kHz)  
119 connected to a sound level meter (Bruël & Kjaer 2238 Mediator, Naerum, Denmark). Noises  
120 were corrected to be closer to the 15 real boat noise spectrums (visually regrouped in four  
121 categories to optimise the correction, Fig. 1) before the intensity modification previously  
122 described. Note that the noise in control was measured to less than  $100$  dB during the noise  
123 exposition in the treatment, little more than during the silence periods (Fig. 1e); it indicates that  
124 boat noise broadcasted in noise treatment tanks are almost not perceived in the control tanks.

#### 125 2.4. Statistical analyses

126 Statistical analyses were performed using R (version 4.0.3) with a significant threshold at  
127 5%. We performed a survival analysis (Log-Rank test) to compare survival (death age) and age  
128 at maturity (first clutch age) between control and noise treatment. Due to the normality of data,  
129 according to Shapiro test, we used t-test on clutch frequency (i.e., mean time between two  
130 clutches) and mean clutch size. To test noise effect on the total number of clutches and offspring  
131 along life we used a GLM with log function as the link function for quasi-Poisson distribution.

132

### 133 3. Results

134

135 The boat noises did not affect neither the survival of *D. magna* (p-value =  $0.51$ , Fig. 2a)  
136 neither the fecundity parameters, i.e., clutch frequency (p-value =  $0.27$ , Fig. 2b), clutch size (p-

137 value = 0.72, Fig. 2c) and age at maturity (p-value = 0.65). The number of clutches (p-value =  
138 0.06, Fig. 2d) and the total offspring production (p-value = 0.22, Fig. 2e), i.e., a proxy of  
139 individual fitness, were also not affected by boat noise treatment.

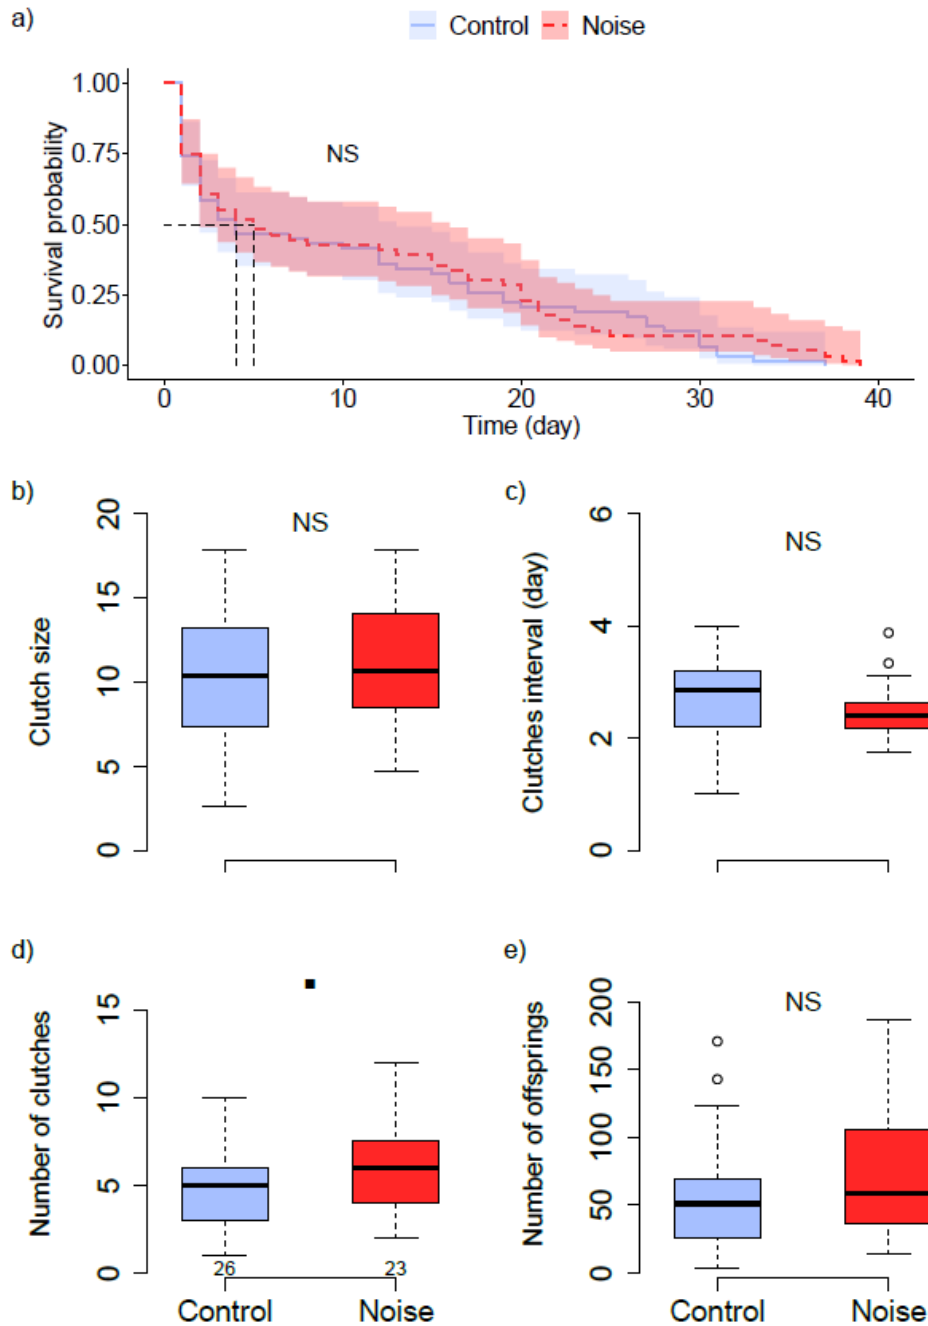

**Figure 2.** Effects of noise treatments on *Daphnia magna* survival and fecundity. a) Survival of *D. magna*; b) clutch size; c) clutch frequency; d) total number of clutches during lifetime; and e) total number of offsprings during lifetime. Numbers in d) are the numbers of *D. magna* for the two treatments. a) Representation according to the Kaplan-Meier method; b-e) central bars represent the median, boxes the interquartile range, and dots the outliers ( $> 1.5$  times the interquartile range). Statistical analysis: dot  $P < 0.1$ , \*  $P < 0.05$ ; \*\*  $P < 0.01$ ; NS  $P > 0.1$ .



## 140 **4. Discussion**

141 We investigated the effect of chronic motorboat noise exposure on the fitness of the water  
142 flea *Daphnia magna*. Contrary to our expectations we did not find any effect of chronic  
143 exposure of boat noise on survival and fecundity parameters. Our findings contradicted  
144 previous results obtained with another type of chronic noise exposition. Therefore, our results  
145 raise the question of effects related to temporal and structural variations in noise.

146 We did not observe any effect of chronic boat noise exposition on *Daphnia magna* fecundity  
147 or survival. These results are opposite to Prosnier et al.'s one (2022), where an exposition to a  
148 continuous broadband noise leads to a surprising increase of individuals' fitness. This  
149 contradiction suggested that the effect of chronic noise pollution, on zooplankton species, could  
150 depend on the structure of noise. Indeed, in the previous experiment broadband noise was  
151 continuous, at high level (130 dB re 1  $\mu$ Pa) for all frequencies (from 0.1 to 20 kHz), whereas  
152 here we used irregular sounds (a total of 2h of noise between 9 a.m. and 9 p.m.), with various  
153 levels (from 108 to 136 dB) and various frequency (some boat noises with low intensity  
154 between 0 and 1 kHz). It is already known, in hearing vertebrates, that animals respond  
155 differently to chronic noise pollution if there are, or not, temporal variations (continuous,  
156 regular, irregular) or structural variations (i.e., variation in the frequencies). Nichols et al.  
157 (2015) showed that fish are more stressed (higher cortisol concentration) with higher noise  
158 exposition (from 126 to 141 dB), and with an intermittent random noise compared to a  
159 continuous one. However, the review of de Jong et al. (2020) on noise effects on fecundity  
160 revealed that continuous noise with irregular frequencies, such as boat noise, have a greater  
161 negative impact. Another study, on larvae of zebrafish using white noise, showed a higher  
162 negative effect of a continuous noise on survival and a higher cortisol concentration (Lara &  
163 Vasconcelos, 2021). Thus, it seems that, for hearing vertebrates, depending of the

164 developmental stage and the considered characteristic, both temporal and structural sound  
165 pattern should be considered to understand how noise affect organism. For the smaller  
166 organisms, like zooplankton, little is known about the important of sound pattern. Here, the  
167 comparison with Lara & Vasconcelos (2021) and Prosnier et al. (2022) suggest that patterns  
168 should also be considered in understanding the noise effects, with higher effect with a  
169 continuous noise.

170 Current studies on noise exposition suggest that it is important to consider, as for other  
171 pollutants, the many ways in which organisms could be exposed to acoustic pollution (chronic  
172 vs acute), and the many organisms that could be affected by this pollution (e.g., fish vs  
173 zooplankton). Next step should be in two directions. The first one is to continue to investigate  
174 how noise affects organisms: which noise (acute or chronic, continuous or not, various  
175 frequency ...) affect which organism (hearing species, zooplankton) in which way (behaviour  
176 and fitness) through which mechanism (physiology, environmental perception, ability to prey)  
177 (Duarte et al., 2021). The second one is the impact on more complex system, as a food web,  
178 with various organisms that are not similarly impacted by a type of noise (see for instance Rojas  
179 et al., 2022). As for other pollutants, these studies seem mandatory to understand how  
180 anthropogenic noise could affect ecosystems.

## 181 **Acknowledgment**

182 The authors would like to thank all the people who contributed to the success of this experiment:  
183 Nicolas Boyer and Aurélie Pradeau for *Daphnia* rearing and providing material, Léo Papet and Joël  
184 Attia for the acoustic treatments and analysis and for providing material, Olivier Valéro for sounds  
185 recording, Marilyn Beauchaud and Paolo Fonseca for the acoustic calibration, and the EYD (ENES  
186 Young Discussion) for the useful discussions.

## 187 **Conflict of interest disclosure**

188 The authors declare they have no conflict of interest relating to the content of this article.

## 189 **Data, script and code availability**

190 Data, script and code are available on Zenodo. DOI: 10.5281/zenodo.7339911 (Prosnier *et al.* 2022)

191

## 192 **References**

- 193 André M, Solé M, Lenoir M, Durfort M, Quero C, Mas A, Lombarte A, van der Schaar M, López-Bejar M,  
194 Morell M, Zaugg S, Houégnigan L (2011) Low-frequency sounds induce acoustic trauma in cephalopods.  
195 *Frontiers in Ecology and the Environment*, **9**, 489–493. <https://doi.org/10.1890/100124>
- 196 Buskey EJ, Lenz PH, Hartline DK (2002) Escape behavior of planktonic copepods in response to hydrodynamic  
197 disturbances: high speed video analysis. *Marine Ecology Progress Series*, **235**, 135–146.  
198 <https://doi.org/10.3354/meps235135>
- 199 Duarte CM, Chapuis L, Collin SP, Costa DP, Devassy RP, Eguiluz VM, Erbe C, Gordon TAC, Halpern BS,  
200 Harding HR, Havlik MN, Meekan M, Merchant ND, Miksis-Olds JL, Parsons M, Predragovic M, Radford  
201 AN, Radford CA, Simpson SD, Slabbekoorn H, Staaterman E, Van Opzeeland IC, Winderen J, Zhang X,  
202 Juanes F (2021) The soundscape of the Anthropocene ocean. *Science*, **371**, eaba4658.  
203 <https://doi.org/10.1126/science.aba4658>
- 204 Gassie D V., Lenz PH, Jeannette Y, Hartline DK (1993) Mechanoreception in zooplankton first antennae:  
205 electrophysiological techniques. *Bulletin of Marine Science*, **53**, 96–105.
- 206 Hawkins AD, Pembroke AE, Popper AN (2015) Information gaps in understanding the effects of noise on fishes  
207 and invertebrates. *Reviews in Fish Biology and Fisheries*, **25**, 39–64. [https://doi.org/10.1007/s11160-014-](https://doi.org/10.1007/s11160-014-9369-3)  
208 [9369-3](https://doi.org/10.1007/s11160-014-9369-3)
- 209 Jan N, Majeed N, Ahmad M, Ahmad Lone W, John R (2022) Nano-pollution: Why it should worry us.  
210 *Chemosphere*, **302**, 134746. <https://doi.org/10.1016/j.chemosphere.2022.134746>
- 211 de Jong K, Forland TN, Amorim MCP, Rieucan G, Slabbekoorn H, Sivle LD (2020) Predicting the effects of  
212 anthropogenic noise on fish reproduction. *Reviews in Fish Biology and Fisheries*, **30**, 245–268.  
213 <https://doi.org/10.1007/s11160-020-09598-9>
- 214 Kunc HP, Schmidt R (2019) The effects of anthropogenic noise on animals: a meta-analysis. *Biology Letters*, **15**,

- 215 20190649. <https://doi.org/10.1098/rsbl.2019.0649>
- 216 Lara RA, Vasconcelos RO (2021) Impact of noise on development, physiological stress and behavioural patterns  
217 in larval zebrafish. *Scientific Reports*, **11**, 6615. <https://doi.org/10.1038/s41598-021-85296-1>
- 218 Longcore T, Rich C (2004) Ecological light pollution. *Frontiers in Ecology and the Environment*, **2**, 191–198.  
219 [https://doi.org/10.1890/1540-9295\(2004\)002\[0191:ELP\]2.0.CO;2](https://doi.org/10.1890/1540-9295(2004)002[0191:ELP]2.0.CO;2)
- 220 McCauley RD, Day RD, Swadlow KM, Fitzgibbon QP, Watson RA, Semmens JM (2017) Widely used marine  
221 seismic survey air gun operations negatively impact zooplankton. *Nature Ecology & Evolution*, **1**, 0195.  
222 <https://doi.org/10.1038/s41559-017-0195>
- 223 Nichols TA, Anderson TW, Širović A (2015) Intermittent noise induces physiological stress in a coastal marine  
224 fish (CA Radford, Ed.). *PLoS ONE*, **10**, e0139157. <https://doi.org/10.1371/journal.pone.0139157>
- 225 Parmar TK, Rawtani D, Agrawal YK (2016) Bioindicators: the natural indicator of environmental pollution.  
226 *Frontiers in Life Science*, **9**, 110–118. <https://doi.org/10.1080/21553769.2016.1162753>
- 227 Popper AN, Hawkins AD (2019) An overview of fish bioacoustics and the impacts of anthropogenic sounds on  
228 fishes. *Journal of Fish Biology*, **94**, 692–713. <https://doi.org/10.1111/jfb.13948>
- 229 Prosnier L, Rojas E, Valéro O, Médoc V (2022) Chronic noise unexpectedly increases fitness of a freshwater  
230 zooplankton. *bioRxiv*, 2022.11.19.517212. <https://doi.org/10.1101/2022.11.19.517212>
- 231 Prosnier L, Rojas E, Médoc V (2022). Datasets and R source code of manuscript "A freshwater zooplankton in  
232 the face to boat noise pollution" [Data set]. Zenodo. <https://doi.org/10.5281/zenodo.7339911>
- 233 Richardson WJ, Fraker MA, Würsig B, Wells RS (1985) Behaviour of Bowhead Whales *Balaena mysticetus*  
234 summering in the Beaufort Sea: Reactions to industrial activities. *Biological Conservation*, **32**, 195–230.  
235 [https://doi.org/10.1016/0006-3207\(85\)90111-9](https://doi.org/10.1016/0006-3207(85)90111-9)
- 236 Rojas E, Gouret M, Agostini S, Fiorini S, Fonseca P, Lacroix G, Médoc V (2022) From behaviour to complex  
237 communities: Resilience to anthropogenic noise in a fish-induced trophic cascade. *bioRxiv*,  
238 2022.07.05.498792. <https://doi.org/10.1101/2022.07.05.498792>
- 239 Rojas E, Thévenin S, Montes G, Boyer N, Médoc V (2021) From distraction to habituation: Ecological and  
240 behavioural responses of invasive fish to anthropogenic noise. *Freshwater Biology*, **66**, 1606–1618.  
241 <https://doi.org/10.1111/fwb.13778>
- 242 Sabet SS, Karnagh SA, Azbari FZ (2019) Experimental test of sound and light exposure on water flea swimming  
243 behaviour. *Proceedings of Meetings on Acoustics*, **37**, 010015. <https://doi.org/10.1121/2.0001270>
- 244 Sabet SS, Neo YY, Slabbekoorn H (2015) The effect of temporal variation in sound exposure on swimming and

- 245 foraging behaviour of captive zebrafish. *Animal Behaviour*, **107**, 49–60.
- 246 <https://doi.org/10.1016/j.anbehav.2015.05.022>
- 247 Shannon G, McKenna MF, Angeloni LM, Crooks KR, Fristrup KM, Brown E, Warner KA, Nelson MD, White  
248 C, Briggs J, McFarland S, Wittemyer G (2016) A synthesis of two decades of research documenting the  
249 effects of noise on wildlife. *Biological Reviews*, **91**, 982–1005. <https://doi.org/10.1111/brv.12207>
- 250 Song Y, Xie L, Lee Y, Brede DA, Lyne F, Kassaye Y, Thaulow J, Caldwell G, Salbu B, Tollefsen KE (2020)  
251 Integrative assessment of low-dose gamma radiation effects on *Daphnia magna* reproduction: Toxicity  
252 pathway assembly and AOP development. *Science of The Total Environment*, **705**, 135912.  
253 <https://doi.org/10.1016/j.scitotenv.2019.135912>
- 254 Truhaut R (1977) Ecotoxicology: Objectives, Principles and Perspectives. *Ecotoxicology and Environmental*  
255 *Safety*, **1**, 373–413. <https://doi.org/10.1016/B978-0-08-021998-1.50038-5>
- 256 Villeneuve DL, Garcia-Reyero N (2011) Vision & strategy: Predictive ecotoxicology in the 21st century.  
257 *Environmental Toxicology and Chemistry*, **30**, 1–8. <https://doi.org/10.1002/etc.396>
- 258 Williams R, Wright AJ, Ashe E, Blight LK, Bruinjes R, Canessa R, Clark CW, Cullis-Suzuki S, Dakin DT,  
259 Erbe C, Hammond PS, Merchant ND, O’Hara PD, Purser J, Radford AN, Simpson SD, Thomas L, Wale  
260 MA (2015) Impacts of anthropogenic noise on marine life: Publication patterns, new discoveries, and  
261 future directions in research and management. *Ocean & Coastal Management*, **115**, 17–24.  
262 <https://doi.org/10.1016/j.ocecoaman.2015.05.021>
- 263
- 264
